# Supplementary material for: Genome-wide whole blood transcriptome profiling in a large European cohort of systemic sclerosis patients
Source: PubMed Central journal article supplement — Ann Rheum Dis. 2020 Jun 19;79(9):1218–26. doi: 10.1136/annrheumdis-2020-217116 (PMC7456554; doi:10.1136/annrheumdis-2020-217116), 2020-06-19
Supplement: annrheumdis-2020-217116supp001.pdf [file annrheumdis-2020-217116supp001.pdf]

## Supplemental Material

### COLLABORATORS

**PRECISESADS SSc substudy group:** Doreen Belz<sup>3</sup>, Eduardo Collantes-Estevez<sup>8</sup>, Francesca Ingegnoli<sup>7</sup>, Yolanda Jimenez Gómez<sup>8</sup>, Chary Lopez Pedrera<sup>8</sup>, Rik Lories<sup>4</sup>, Gaia Montanelli<sup>1</sup>, Silvia Piantoni<sup>11</sup>, Ignasi Rodriguez Pinto<sup>6</sup>, Carlos Vasconcelos<sup>9</sup>.

**PRECISESADS Flow Cytometry study group:** Christophe Jamin<sup>10</sup>, Concepción Marañón<sup>2</sup>, Lucas Le Lann<sup>10</sup>, Quentin Simon<sup>10</sup>, Bénédicte Rouvière<sup>10</sup>, Nieves Varela<sup>2</sup>, Brian Muchmore<sup>2</sup>, Aleksandra Dufour<sup>11</sup>, Montserrat Alvarez<sup>11</sup>, Jonathan Cremer<sup>14</sup>, Nuria Barbarroja<sup>8</sup>, Velia Gerl<sup>15</sup>, Laleh Khodadadi<sup>15</sup>, Qingyu Cheng<sup>15</sup>, Anne Buttgerit<sup>12</sup>, Aurélie De Groof<sup>16</sup>, Julie Ducreux<sup>16</sup>, Elena Trombetta<sup>17</sup>, Tianlu Li<sup>18</sup>, Damiana Alvarez-Errico<sup>18</sup>, Torsten Witte<sup>19</sup>, Katja Kniesch<sup>19</sup>, Nancy Azevedo<sup>9</sup>, Esmeralda Neves<sup>9</sup>, Sambasiva Rao<sup>20</sup>, Pierre-Emmanuel Jouve<sup>21</sup>

14. Laboratory of Clinical Immunology, Department of Microbiology and Immunology, KU Leuven, Leuven, Belgium.

15. Department of Rheumatology and Clinical Immunology, Charité University Hospital, Berlin, Germany

16. Pôle de Pathologies Rhumatismales Inflammatoires et Systémiques, Institut de Recherche Expérimentale et Clinique, Université catholique de Louvain, Brussels, Belgium

17. Laboratorio di Analisi Chimico Cliniche e Microbiologia - Servizio di Citofluorimetria, Fondazione IRCCS Ca' Granda Ospedale Maggiore Policlinico di Milano, Milano, Italy

18. Chromatin and Disease Group, Bellvitge Biomedical Research Institute (IDIBELL), Barcelona, Spain

19. Klinik für Immunologie und Rheumatologie, Medical University Hannover, Hannover, Germany;

20. Sanofi Genzyme, Framingham, MA, USA

21. AltraBio SAS, Lyon, France

**Software and python libraries used for analysis**

Scikit-learn, <https://scikit-learn.org>. Last accessed 04 Feb 2020

Statmodel, <https://www.statmodels.org/>. Last accessed 04 Feb 2020

Orange, <https://orange.biolab.si>. Last accessed 04 Feb 2020

Matplotlib, <https://matplotlib.org>. Last accessed 04 Feb 2020

## UpSet usage

The UpSet tool (<http://caleydo.org/tools/upset/>) has been developed under different languages and environments. For explorative purposes on druggable pathways we found the web-based interface the most flexible and easy to use implementation but other implementations can be used as well. The interface can be accessed after local deployment; hereafter we provide step-by-step instructions to download all the necessary software and files to run the analysis on our data. All the provided examples are *for Windows*.

1. The Python environment should be installed on your computer (for convenience the open-source Anaconda software can be used: <https://www.anaconda.com/distribution/#download-section>).
2. Download the ZIP file containing the UpSet repository (<https://github.com/VCG/upset/archive/master.zip>) extract the file and place the extracted folder in your preferred location (in the example below on the Desktop). Rename the folder as “upset SSc”.
3. Create a folder named “FAIME SSc” in the “\upset SSc\data” folder. Copy in the newly created “\upset SSc\data\FAIME SSc” the “reactome.json” and the “Drug x reactome.csv” files downloaded from the supplemental materials.
4. Open the Anaconda Prompt:



```
Anaconda Prompt
(base) C:\Users\Lorenzo Beretta>
```

5. locate the upset SSc folder on the Desktop and type in the code below to prepare the local host:

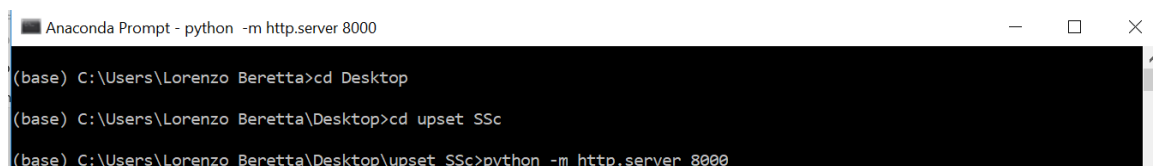

```
Anaconda Prompt - python -m http.server 8000
(base) C:\Users\Lorenzo Beretta>cd Desktop
(base) C:\Users\Lorenzo Beretta\Desktop>cd upset SSc
(base) C:\Users\Lorenzo Beretta\Desktop\upset SSc>python -m http.server 8000
```

6. Open a web browser and in the navigation tab type: *localhost:8000*

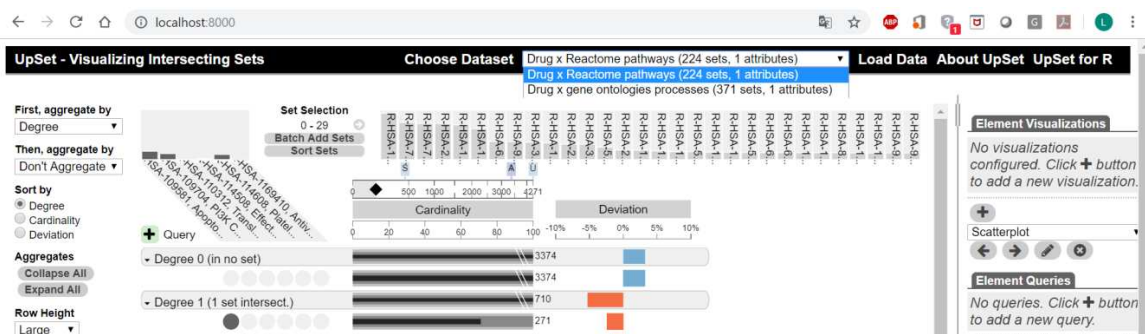

7. Choose the dataset to explore (Drug x Reactome). The other datasets available are those that comes with Upset.

Note that the Dataset made available in the `\upset Ssc\data\FAIME SSc` pathway can be manually explored or used in the UpSetR shiny app (<https://gehlenborglab.shinyapps.io/upsetr/>)

## Legend to Supplementary Figures

### Supplementary Figure 1 – Significant pathways in discovery and validation sets

Plot of individualized Functional Analysis of Individual Microarray Expression (FAIME) scores (left) and FDR-corrected pathways (right) in the discovery (blue line) or in the validation set (orange line). Nominal moderate robust effect size (dr) ( $> 0.62897$  or  $< -0.62897$ ) and false-discovery adjusted p values ( $< 0.05$ ) are depicted as dashed lines.

### Supplementary Figure 2 – Heatmap of validated FAIME pathways

Heatmap representation of replicated pathways scored according to the Functional Analysis of Individual Microarray Expression (FAIME) method in the discovery (purple) or validation (pink) sets. Patients (in red) and controls (in green) are clustered column-wise via the k-means algorithm, genes are clustered row-wise via the hierarchical clustering Ward method. Patient-wise data standardization was applied before clustering. Due to magnification issues, labeling of hierarchical clustering is detailed in the Supplemental Figure 3.

### Supplementary Figure 3 – Clusters of FAIME pathways from Supplementary Figure 2

Magnification of functionally annotated pathways from the heatmap representation in Supplemental Figure 2 (y-axis) and clustered according to the hierarchical clustering method.

### Supplementary Figure 4 – Screenshot from Upset

Example of Upset representation of intersecting sets. Druggable pathways belonging to the immune system activation/IFN signalling are explored; the Drug Gene Interaction database (DGIdb) is used as reference.
