# Supplementary material for: Genome-wide whole blood transcriptome profiling in a large European cohort of systemic sclerosis patients
Source: PubMed Central journal article supplement — Ann Rheum Dis. 2020 Jun 19;79(9):1218–26. doi: 10.1136/annrheumdis-2020-217116 (PMC7456554; doi:10.1136/annrheumdis-2020-217116), 2020-06-19
Supplement: annrheumdis-2020-217116supp010.pdf [file annrheumdis-2020-217116supp010.pdf]

**Supplemental Table – Pathways of interest associated with previous evidences in systemic sclerosis (SSc)**

| Reactome ID                                    | Pathway                                                                                                                              | Effect | Reference |
|------------------------------------------------|--------------------------------------------------------------------------------------------------------------------------------------|--------|-----------|
| R-HSA-114608                                   | Platelet degranulation                                                                                                               | ↑      | 1         |
| R-HSA-76005                                    | Response to elevated platelet cytosolic Ca <sup>2+</sup>                                                                             | ↑      | 2         |
| R-HSA-1592389                                  | Activation of metalloproteinases                                                                                                     | ↑      | 3, 4      |
| R-HSA-3371453                                  | Regulation of the heat shock factor 1 (HSF1)-mediated heat shock response                                                            | ↑      | 5         |
| R-HSA-171007<br>R-HSA-198753                   | p38-mitogen-activated protein kinase (p38MAPK) events<br>extracellular signal-regulated kinases (ERK)/MAPK targets                   | ↑      | 6, 7      |
| R-HSA-140877<br>R-HSA-140875<br>R-HSA-140837   | Formation of Fibrin Clot (Clotting Cascade)<br>Common Pathway of Fibrin Clot Formation<br>Intrinsic Pathway of Fibrin Clot Formation | ↑      | 8         |
| R-HSA-400685<br>R-HSA-373755<br>R-HSA-416700   | Sema4D in semaphorin signaling<br>Semaphorin interactions<br>Other semaphorin interactions                                           | ↑      | 9         |
| R-HSA-5654738<br>R-HSA-5655253<br>R-HSA-190236 | Signaling by fibroblast growth factor (FGFR)-2<br>Signaling by FGFR2 in disease<br>Signaling by FGFR                                 | ↓      | 10-12     |
| R-HSA-389356<br>R-HSA-38935                    | CD28 co-stimulation<br>CD28 dependent PI3K/Akt signaling                                                                             | ↓      | 13, 14    |

Validated reactome pathways whose deregulation may be linked with previously existing evidences or pathogenetic mechanisms observed in SSc. Effect, effect size indicating an increased (upward pointing arrow) or a decreased (downward pointing arrow) expression in SSc compared to controls.

#### Table references

1. Maugeri N, Franchini S, Campana L, *et al.* Circulating platelets as a source of the damage-associated molecular pattern HMGB1 in patients with systemic sclerosis. *Autoimmunity*

- 2012;**45**:584–7. doi:10.3109/08916934.2012.719946
2. Postlethwaite AE, Chiang TM. Platelet contributions to the pathogenesis of systemic sclerosis. *Curr Opin Rheumatol* 2007;**19**:574–9. doi:10.1097/BOR.0b013e3282eeb3a4
  3. Kim W-U, Min S-Y, Cho M-L, *et al.* Elevated matrix metalloproteinase-9 in patients with systemic sclerosis. *Arthritis Res Ther* 2005;**7**:R71-9. doi:10.1186/ar1454
  4. Asano Y, Ihn H, Jinnin M, *et al.* Serum levels of matrix metalloproteinase-13 in patients with eosinophilic fasciitis. *J Dermatol.* 2014;**41**:746–748. doi:10.1111/1346-8138.12563
  5. Chu H, Jiang S, Liu Q, *et al.* Sirtuin1 Protects against Systemic Sclerosis-related Pulmonary Fibrosis by Decreasing Proinflammatory and Profibrotic Processes. *Am J Respir Cell Mol Biol* 2018;**58**:28–39. doi:10.1165/rcmb.2016-0192OC
  6. Sato M, Shegogue D, Gore EA, *et al.* Role of p38 MAPK in transforming growth factor beta stimulation of collagen production by scleroderma and healthy dermal fibroblasts. *J Invest Dermatol* 2002;**118**:704–11. doi:10.1046/j.1523-1747.2002.01719.x
  7. Matsushita T, Date M, Kano M, *et al.* Blockade of p38 Mitogen-Activated Protein Kinase Inhibits Murine Sclerodermatous Chronic Graft-versus-Host Disease. *Am J Pathol.* 2017;**187**(4):841–850. doi:10.1016/j.ajpath.2016.12.016
  8. Ludwicka-Bradley A, Silver RM, Bogatkevich GS. Coagulation and autoimmunity in scleroderma interstitial lung disease. *Semin Arthritis Rheum* 2011;**41**:212–22. doi:10.1016/j.semarthrit.2010.10.002
  9. Romano E, Rosa I, Fioretto BS, *et al.* A new avenue in the pathogenesis of systemic sclerosis: the molecular interface between the endothelial and the nervous systems. *Clin Exp Rheumatol*; **37 Suppl 1**:133–40. <http://www.ncbi.nlm.nih.gov/pubmed/31025932>
  10. Seghezzi G, Patel S, Ren CJ, *et al.* Fibroblast growth factor-2 (FGF-2) induces vascular endothelial growth factor (VEGF) expression in the endothelial cells of forming capillaries: an autocrine mechanism contributing to angiogenesis. *J Cell Biol* 1998;**141**:1659–73. doi:10.1083/jcb.141.7.1659

11. Matucci-Cerinic M, Manetti M, Bruni C, *et al.* The ‘myth’ of loss of angiogenesis in systemic sclerosis: a pivotal early pathogenetic process or just a late unavoidable event? *Arthritis Res Ther* 2017;**19**:162. doi:10.1186/s13075-017-1370-5
12. Correia ACP, Moonen J-RAJ, Brinker MGL, *et al.* FGF2 inhibits endothelial-mesenchymal transition through microRNA-20a-mediated repression of canonical TGF- $\beta$  signaling. *J Cell Sci* 2016;**129**:569–79. doi:10.1242/jcs.176248
13. Akieda Y, Wakamatsu E, Nakamura T, *et al.* Defects in regulatory T cells due to CD28 deficiency induce a qualitative change of allogeneic immune response in chronic graft-versus-host disease. *J Immunol* 2015;**194**:4162–74. doi:10.4049/jimmunol.1402591
14. Li G, Larregina AT, Domsic RT, *et al.* Skin-Resident Effector Memory CD8+CD28- T Cells Exhibit a Profibrotic Phenotype in Patients with Systemic Sclerosis. *J Invest Dermatol* 2017;**137**:1042–50. doi:10.1016/j.jid.2016.11.037
