# Supplementary figures and images for: Genome-wide whole blood transcriptome profiling in a large European cohort of systemic sclerosis patients
Source: PubMed Central journal article supplement — Ann Rheum Dis. 2020 Jun 19;79(9):1218–26. doi: 10.1136/annrheumdis-2020-217116 (PMC7456554; doi:10.1136/annrheumdis-2020-217116), 2020-06-19

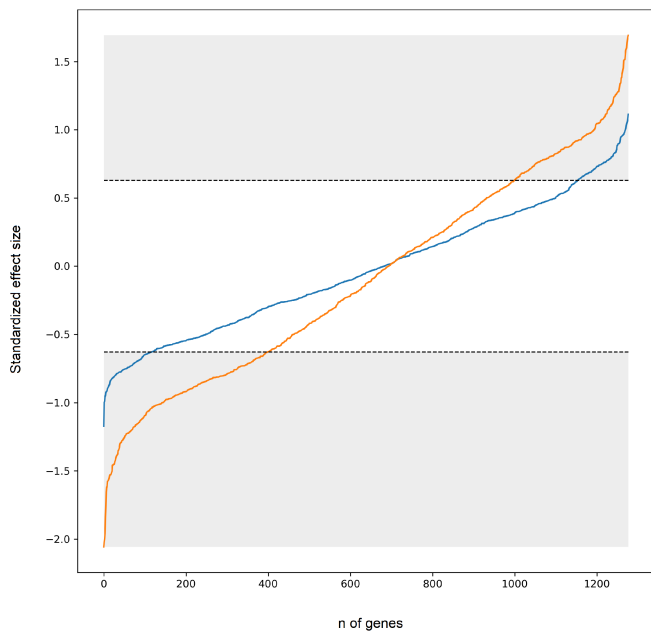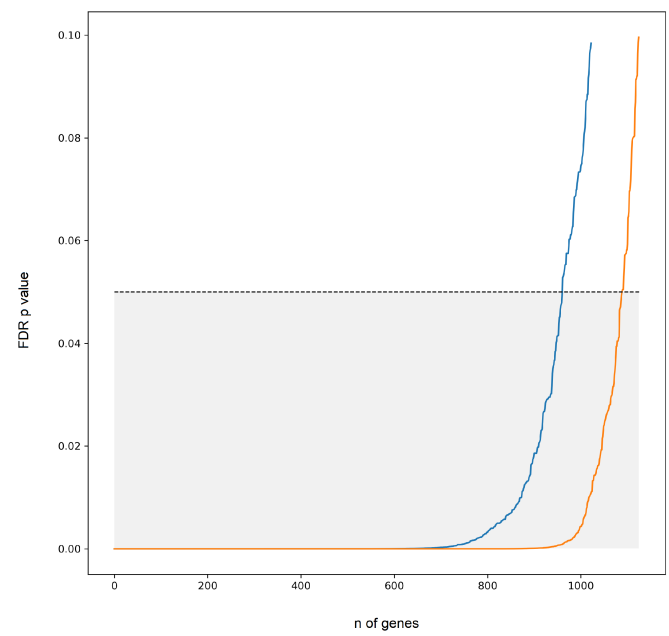

Supplement: annrheumdis-2020-217116supp003.pdf [file annrheumdis-2020-217116supp003.pdf]

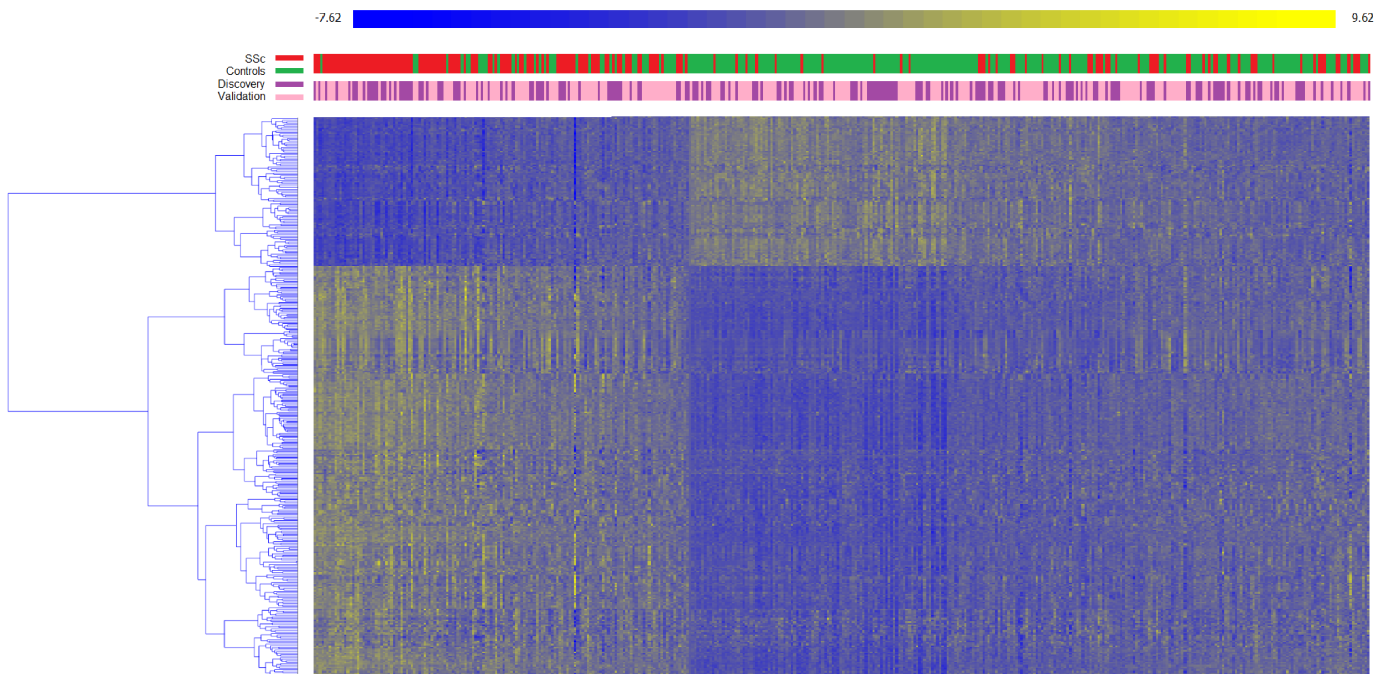

Supplement: annrheumdis-2020-217116supp005.pdf [file annrheumdis-2020-217116supp005.pdf]

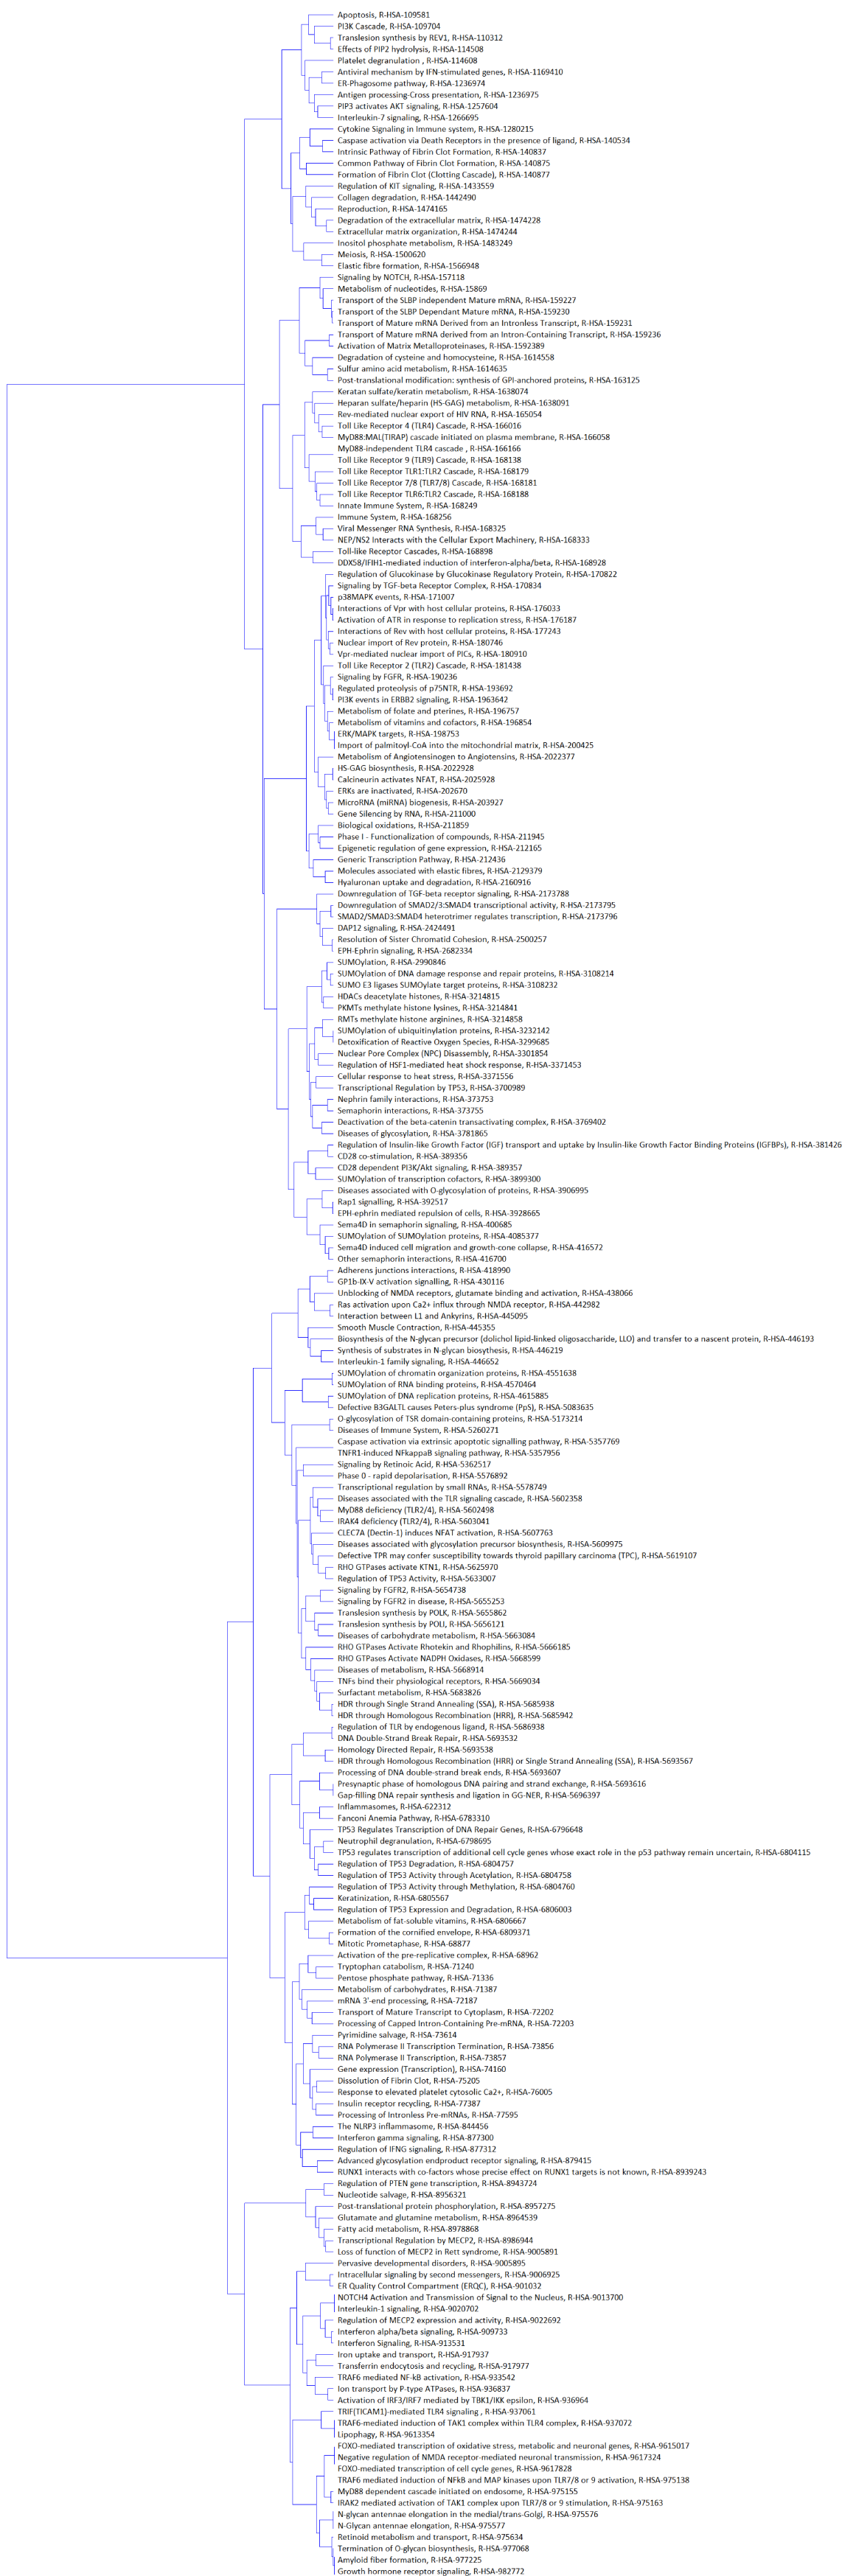

Supplement: annrheumdis-2020-217116supp006.pdf [file annrheumdis-2020-217116supp006.pdf]

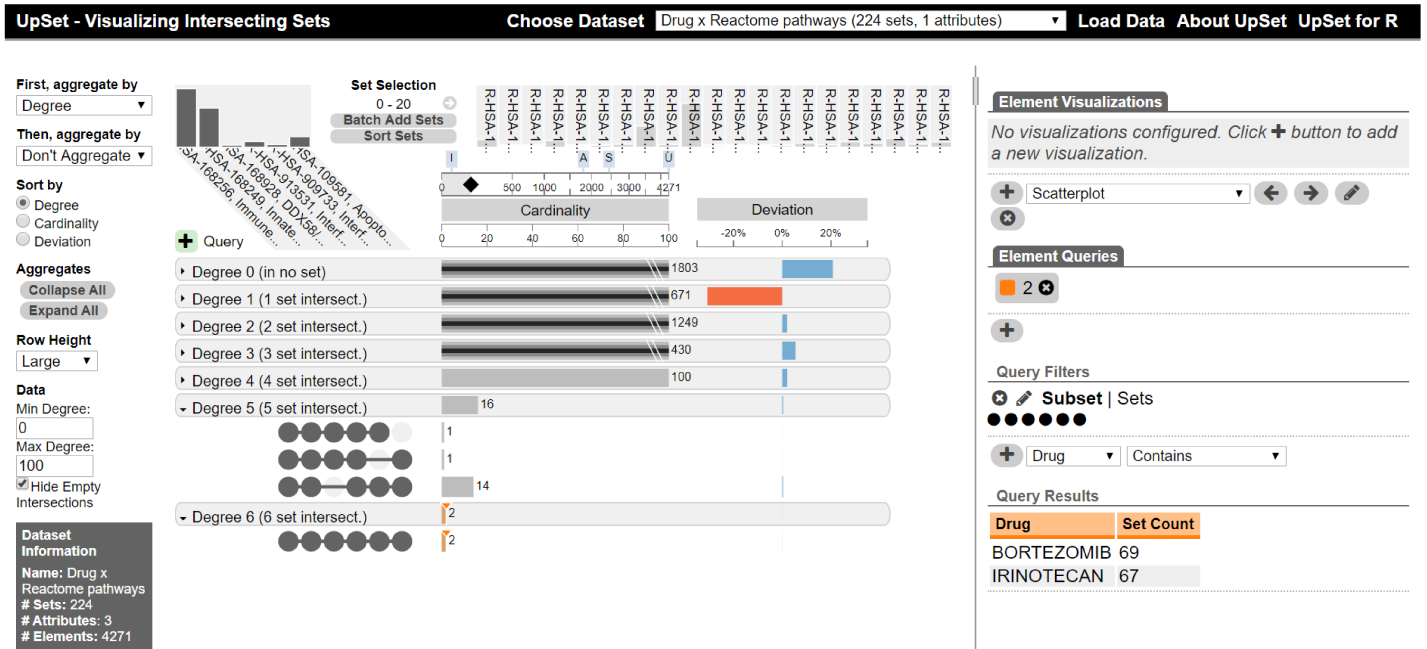

Supplement: annrheumdis-2020-217116supp007.pdf [file annrheumdis-2020-217116supp007.pdf]
